# Supplementary material for: Anisotropic X-ray detection performance of melt-grown CsPbBr3 single crystals
Source: Royal Society of Chemistry journal article supplement (doi:10.1039/d3tc01085f), 2023-01-01
Supplement: d3tc01085f1.pdf [file d3tc01085f1.pdf]

## Supporting Information

### Anisotropic X-ray Detection Performance of Melt-grown CsPbBr<sub>3</sub> Single Crystal

*Yunqiu Hua, † Xue Sun, † Xiang Li, Fucai Cui, Zhongjie Yue, Jiaxin Liu, Hongjie Liu, Guodong Zhang\*, and Xutang Tao\**

Y. Q. Hua, X. Sun, X. Li, F. C. Cui, Z. J. Yue, J. X. Liu, H. J. Liu

Prof. G. D. Zhang, Prof. X. T. Tao

State Key Laboratory of Crystal Materials

Institute of Crystal Materials

Shandong University

Jinan 250100, PR China

E-mail: zgd@sdu.edu.cn

txt@sdu.edu.cn

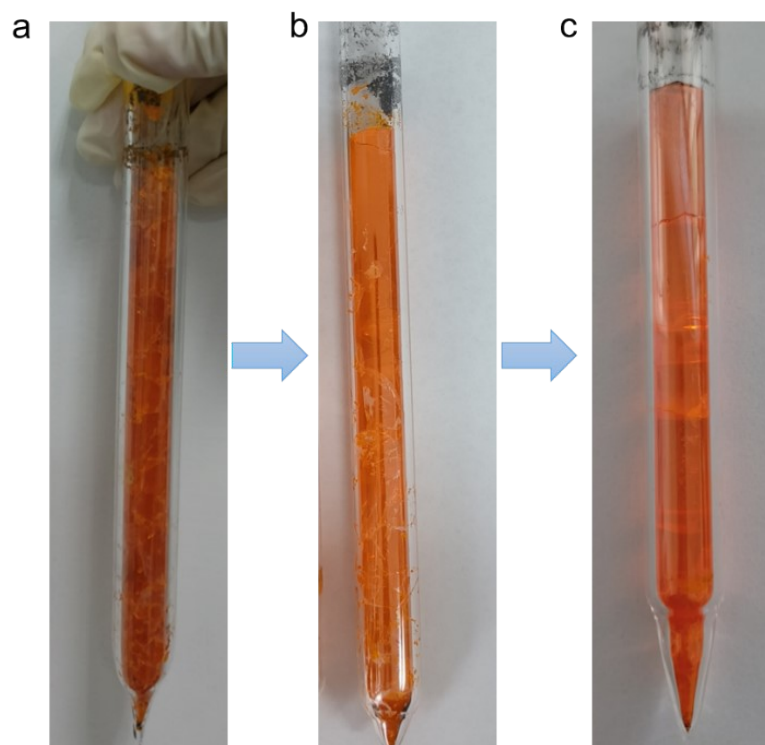

**Fig. S1** CsPbBr<sub>3</sub> polycrystal purified for (a) the first time, (b) the second time, and (c) the third time.

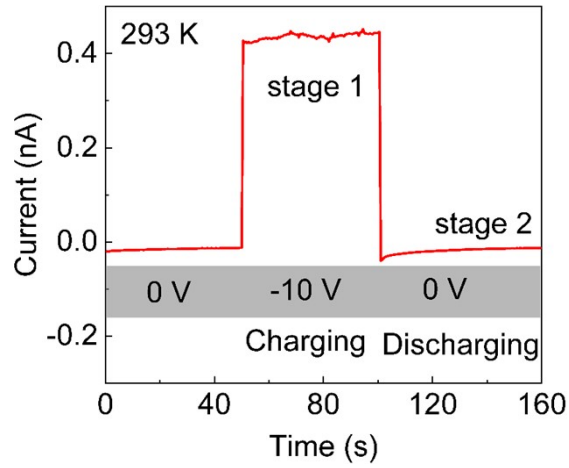

**Fig. S2** Schematic and typical charging-discharging process curve of CsPbBr<sub>3</sub> single crystal.

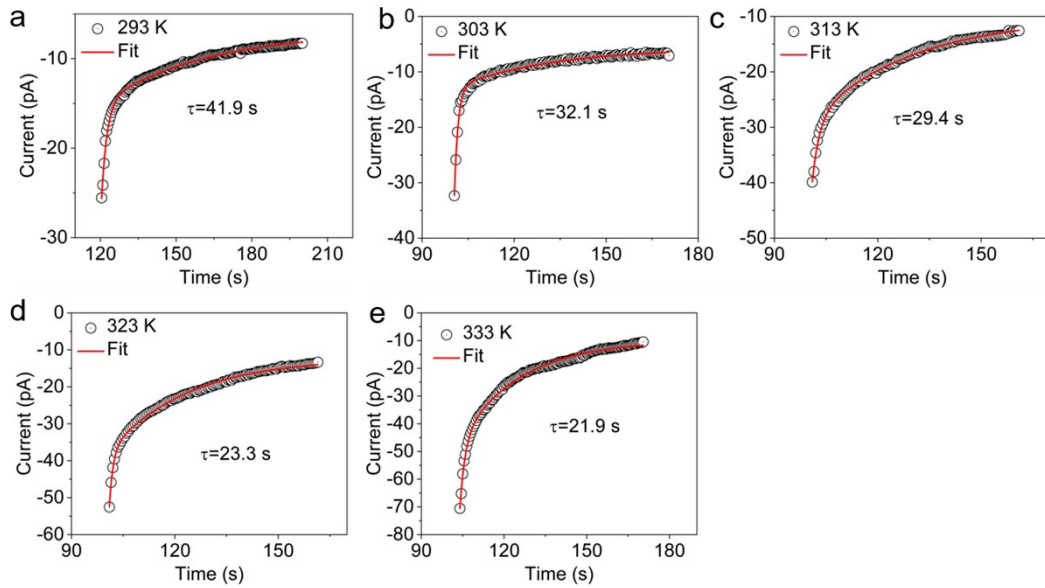

**Fig. S3** The representative temporal response curves of stage 2 at various temperatures from 293 to 333 K for [100] orientation of CsPbBr<sub>3</sub> single crystal.

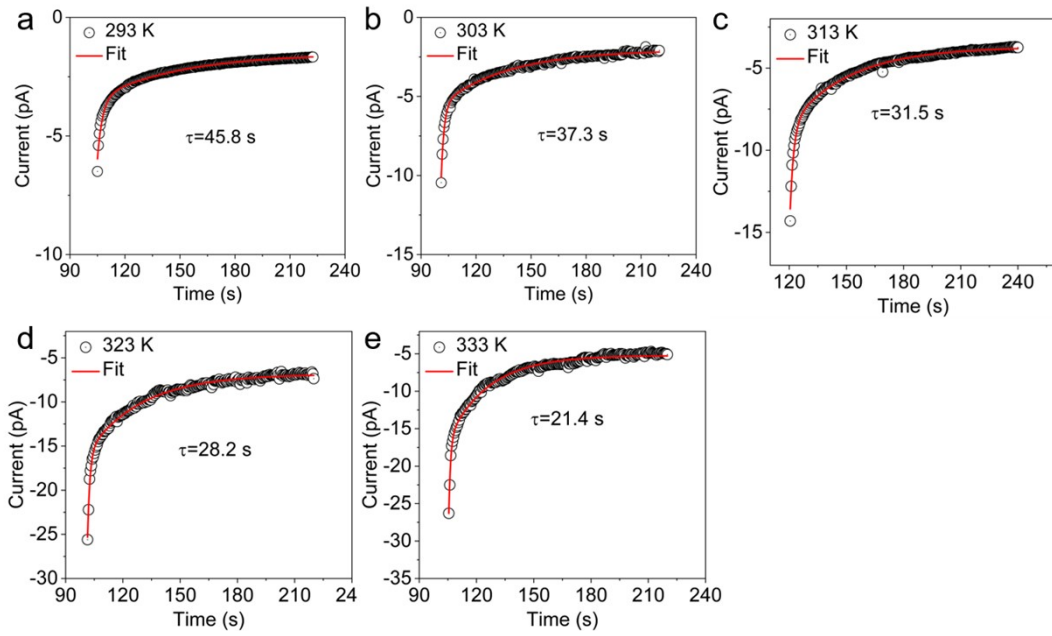

**Fig. S4** The representative temporal response curves of stage 2 at various temperatures from 293 to 333 K for [010] orientation of CsPbBr<sub>3</sub> single crystal.

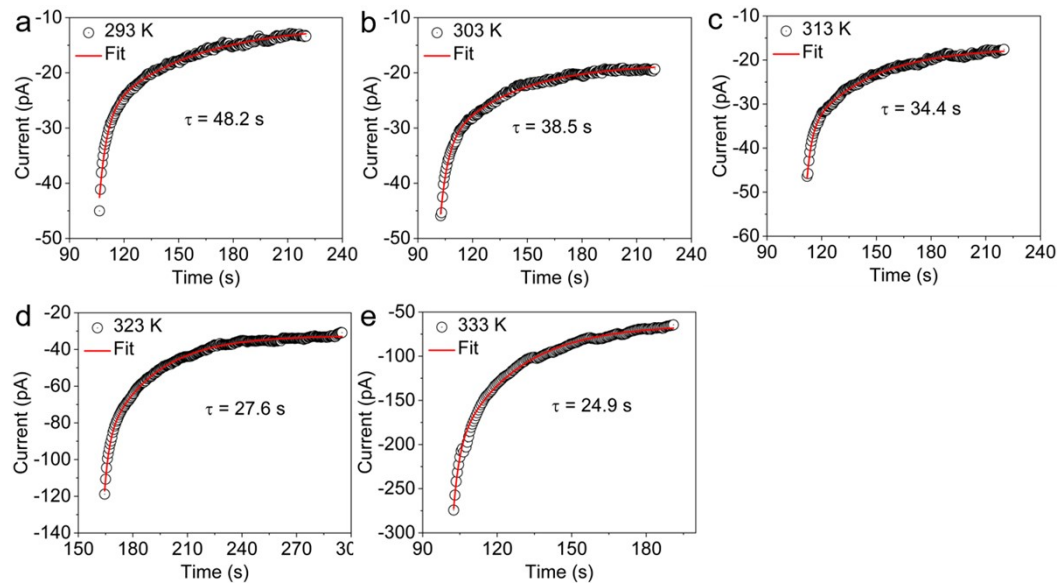

**Fig. S5** The representative temporal response curves of stage 2 at various temperatures from 293 to 333 K for [001] orientation of CsPbBr<sub>3</sub> single crystal.

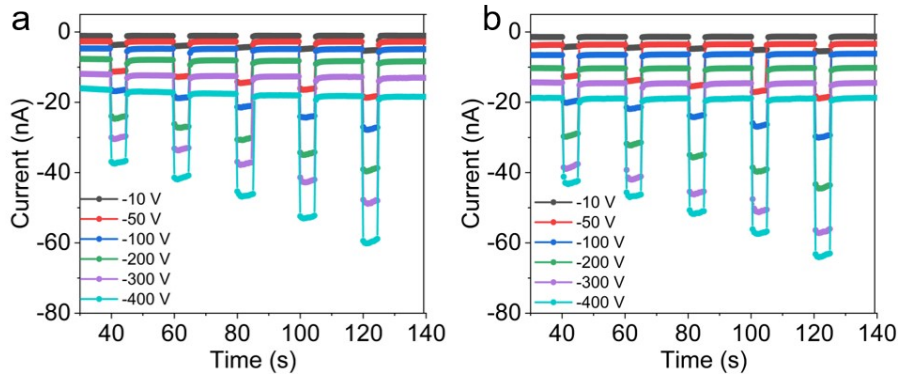

**Fig. S6** Temporal X-ray responses under various voltages from -10 V to -400 V for the device based on the (a) (100) and (b) (001) wafers of the CsPbBr<sub>3</sub> single crystal.

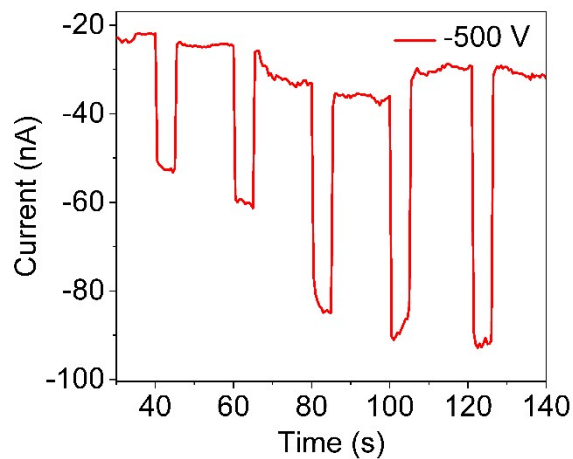

**Fig. S7** Photocurrent-dose rate curves of the (010) detector under -500 V.

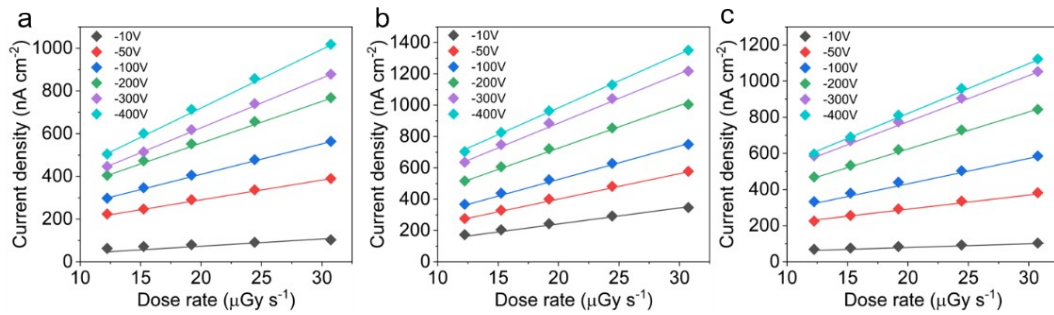

**Fig. S8** Photocurrent response at different reverse biases under 120 keV X-ray various dose rates of the (a) (100), (b) (010), and (c) (001) detectors, respectively.

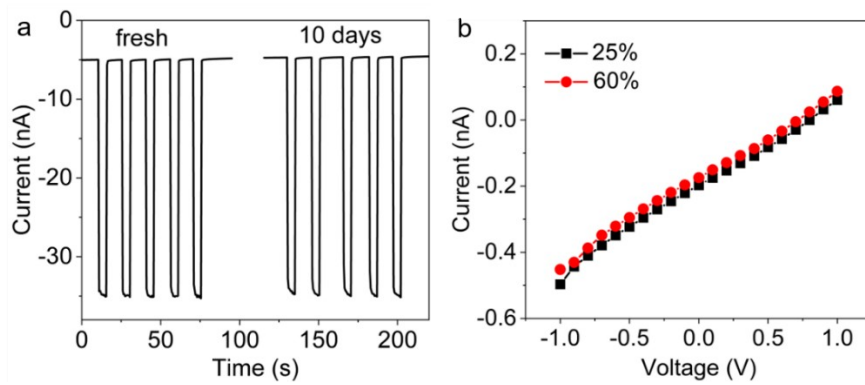

**Fig. S9** (a) X-ray response stability of CsPbBr<sub>3</sub> detector under -100 V at room temperature. (b)  $I$ - $V$  curves of CsPbBr<sub>3</sub> crystal device when the humidity is at 25% and 60%.
